# Supplementary material
Source: PubMed Central journal article supplement (PMC7771469)
Supplement: JCM.02198-20-s0003.pdf [file JCM.02198-20-s0003.pdf]

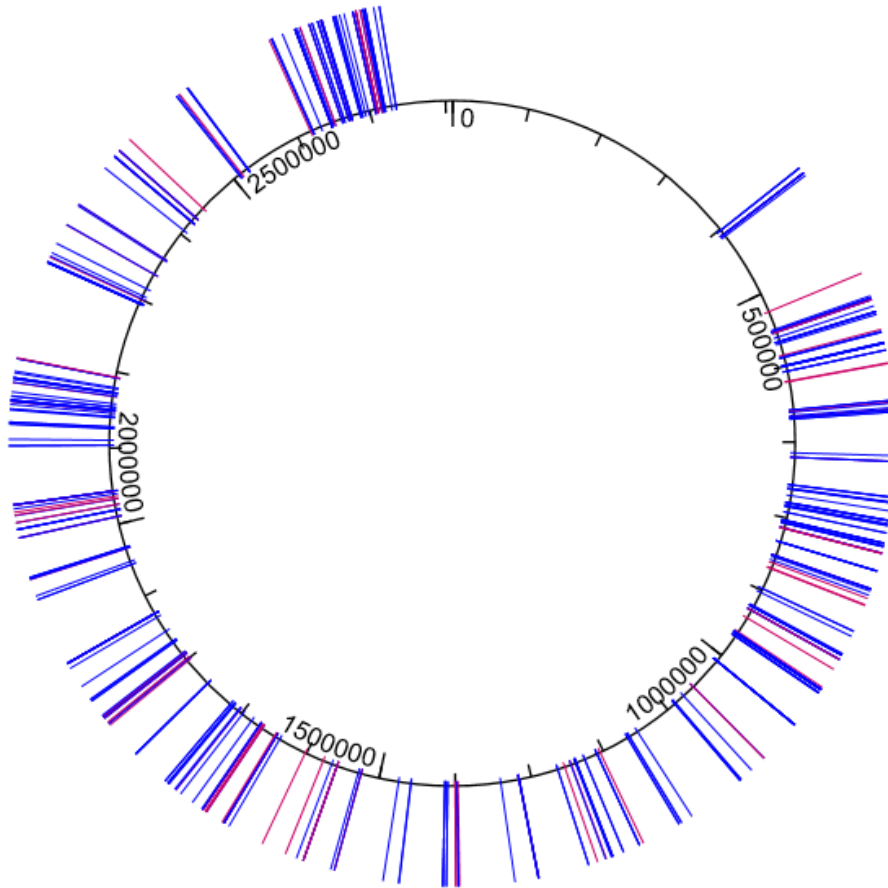

**Figure S2:** Distribution of group-specific SNPs over the genome. Positions (with regards to the *S. aureus* COL reference genome) of SNPs specific for the AFR/AUS group across the genome are marked. Blue lines represent synonymous, red lines stand for non-synonymous SNPs

**Table S2:** Targets with non-synonymous group-specific SNPs and their products.

| <b>Target</b> | <b>Product</b>                                      |
|---------------|-----------------------------------------------------|
| SACOL0401     | hypothetical protein                                |
| SACOL0519     | acetyltransferase                                   |
| SACOL0546     | peptidyl-tRNA hydrolase                             |
| SACOL0564     | pyridoxal biosynthesis lyase PdxS                   |
| SACOL0595     | M20/M25/M40 family peptidase                        |
| SACOL0627     | uracil-DNA glycosylase                              |
| SACOL0635     | lipote-protein ligase A family protein              |
| SACOL0695     | tagG protein, teichoic acid ABC transporter protein |
| SACOL0789     | 7-cyano-7-deazaguanine reductase                    |
| SACOL0790     | integral membrane domain-containing protein         |
| SACOL0825     | HPr kinase/phosphorylase                            |
| SACOL0834     | hypothetical protein                                |
| SACOL0841     | phosphoglyceromutase                                |
| SACOL0916     | SufS subfamily cysteine desulfurase                 |
| SACOL0922     | hypothetical protein                                |
| SACOL0938     | DltD protein                                        |
| SACOL0960     | ornithine--oxo-acid transaminase                    |
| SACOL1048     | acetyltransferase                                   |
| SACOL1198     | cell division protein FtsA                          |
| SACOL1235     | ribulose-phosphate 3-epimerase                      |
| SACOL1245     | 3-oxoacyl-ACP reductase                             |
| SACOL1299     | acetoacetyl-CoA reductase                           |
| SACOL1389     | DNA topoisomerase IV subunit B                      |
| SACOL1390     | DNA topoisomerase IV subunit A                      |
| SACOL1483     | hypothetical protein                                |
| SACOL1518     | cytidylate kinase                                   |
| SACOL1538     | hypothetical protein                                |
| SACOL1565     | arginine repressor                                  |
| SACOL1615     | DEAD/DEAH box helicase                              |
| SACOL1617     | hypothetical protein                                |
| SACOL1637     | molecular chaperone DnaK                            |
| SACOL1640     | coproporphyrinogen III oxidase                      |
| SACOL1675     | TPR domain-containing protein                       |
| SACOL1758     | alanine dehydrogenase                               |
| SACOL1761     | hypothetical protein                                |
| SACOL1767     | septation ring formation regulator EzrA             |
| SACOL1770     | glycerophosphoryl diester phosphodiesterase         |
| SACOL1818     | riboflavin biosynthesis protein                     |
| SACOL1911     | hypothetical protein                                |
| SACOL1947     | hypothetical protein                                |
| SACOL1964     | hypothetical protein                                |
| SACOL1969     | adenylosuccinate lyase                              |
| SACOL1973     | hypothetical protein                                |

|           |                                                  |
|-----------|--------------------------------------------------|
| SACOL1980 | hypothetical protein                             |
| SACOL2083 | thiamine-phosphate pyrophosphorylase             |
| SACOL2107 | phosphotyrosine protein phosphatase              |
| SACOL2132 | hypothetical protein                             |
| SACOL2224 | 50S ribosomal protein L6                         |
| SACOL2276 | inosine-uridine preferring nucleoside hydrolase  |
| SACOL2300 | hypothetical protein                             |
| SACOL2362 | malate:quinone oxidoreductase                    |
| SACOL2368 | acetyltransferase                                |
| SACOL2385 | HSP20 family protein                             |
| SACOL2452 | amino acid ABC transporter permease              |
| SACOL2560 | hydroxymethylglutaryl-CoA reductase, degradative |
| SACOL2582 | hypothetical protein                             |
| SACOL2587 | hypothetical protein                             |
| SACOL2600 | hypothetical protein                             |
| SACOL2617 | alpha-acetolactate decarboxylase                 |
| SACOL2647 | hypothetical protein                             |
| SACOL2651 | tributylin esterase EstA                         |
| SACOL2654 | carbamate kinase                                 |
